# Supplementary material for: Suppression of death receptor 5 enhances cancer cell invasion and metastasis through activation of caspase-8/TRAF2-mediated signaling
Source: PubMed Central journal article supplement (PMC4747408; doi:10.18632/oncotarget.5847), 2015-10-15
Supplement: oncotarget-06-41324-s001.pdf [file oncotarget-06-41324-s001.pdf]

## SUPPLEMENTARY FIGURE

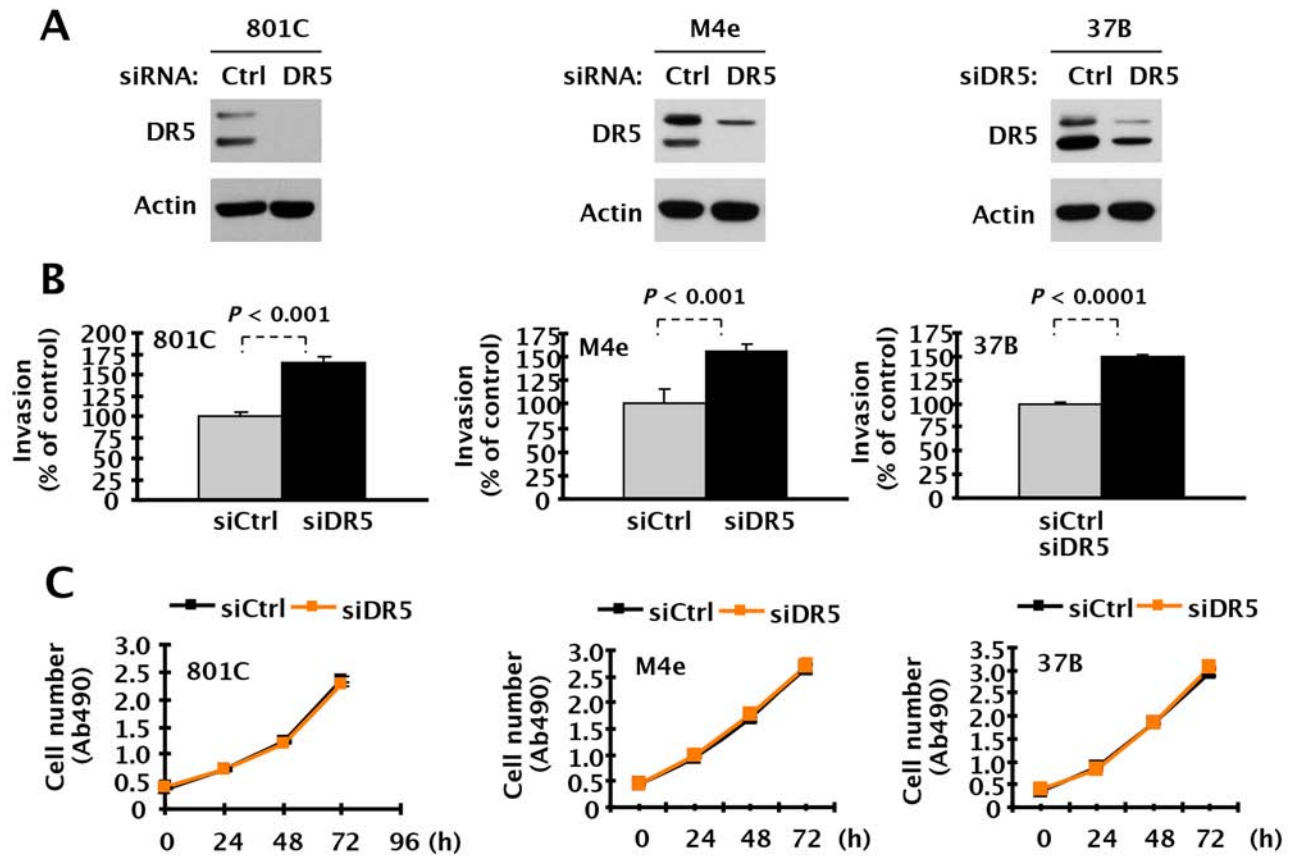

**Supplementary Figure S1: DR5 knockdown increases invasion of cancer cells without affecting cell growth.** 801C, M4e or 37B cells transiently transfected with control (Ctrl) or DR5 siRNA were plated in 12-well plates for evaluating DR5 expression with Western blotting **A**, in the Matrigel invasion chambers for invasion assay **B**, and in 96-well plates for cell growth measurement with the MTS assay **C**, after approximately 48 h incubation. The data are means  $\pm$  SDs of triplicate determinations.
